# Supplementary material
Source: Springer Nature journal article supplement (https://www.springermedizin.de/resource/supplementary/12890_2014_558_MOESM3_ESM.pdf/9505298)

**a**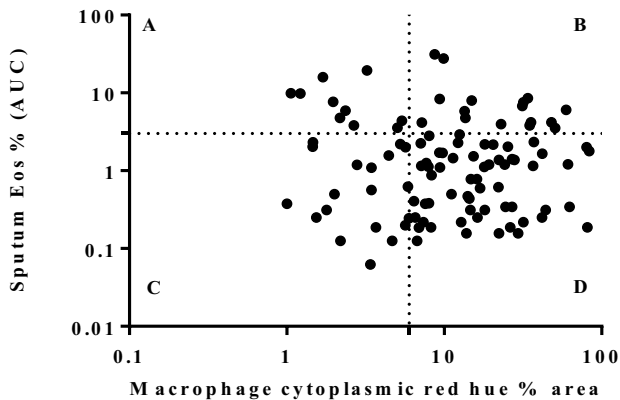**b**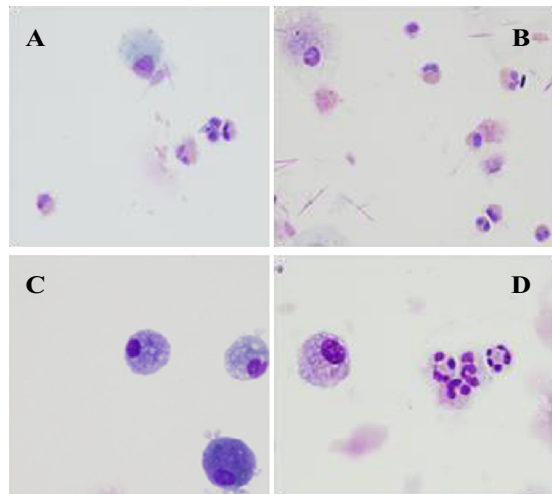**c**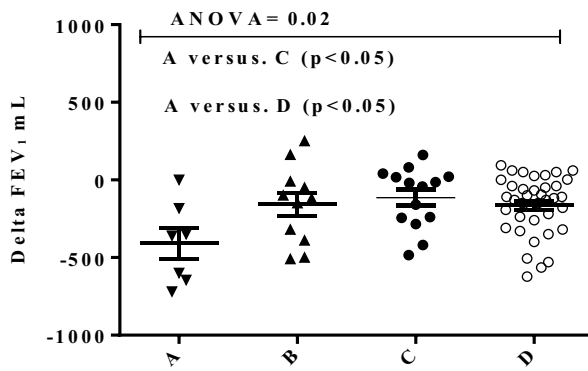

Supplement: MOESM3 [file 9505298]
